# Supplementary material for: Awareness about antibiotic resistance in a self-medication user group from Eastern Romania: a pilot study
Source: PeerJ journal article supplement (doi:10.7717/peerj.3803), 2017-09-12
Supplement: S1_QUESTIONAIRE_english.pdf [file S1_QUESTIONAIRE_english.pdf]

Dear Sir / Madam, through this questionnaire, we invite you to participate in a study on antibiotics - attitudes and perceptions among patients.

Before completing this questionnaire, you will be given explanations and you can ask questions.

Please read the questions carefully and answer as accurately and completely as possible. This questionnaire is anonymous.

Thank you!

### Questionnaire concerning the use of antibiotics - attitudes and perceptions

Fields marked with \* are mandatory.

Q1 \*Your age: \_\_\_\_\_ years

Q2 \*Sex:  Male  
 Female

Q3 \*Place of residence:  Rural  
 Urban

Q4 \*Occupation: .....  
You live in town / village ..... , county .....

Do you currently have a chronic condition?      yes       no

If yes, please indicate:

Diabetes mellitus       Cardiac disease       Chronic hepatitis   
Pulmonary Disease       Dyslipidemia       Stroke   
Anxiety / Depression       Cancer       Obesity

Others: .....

Q5 \* When you fall sick, you appeal to:

- Family doctor
- Another specialist
- Specialist in alternative medicine
- Emergency Room from public hospitals:
- Pharmacist
- Self-medication

Q6 \* How often do you check your health status?

|                       |                       |                       |                       |                       |
|-----------------------|-----------------------|-----------------------|-----------------------|-----------------------|
| Monthly               | Every 3 months        | Yearly                | Occasional            | When necessary        |
| <input type="radio"/> | <input type="radio"/> | <input type="radio"/> | <input type="radio"/> | <input type="radio"/> |

Q7 \* How do you appreciate your overall health status?

|                       |                       |                       |                       |                       |
|-----------------------|-----------------------|-----------------------|-----------------------|-----------------------|
| Excellent             | Good                  | Medium                | Poor                  | Bad                   |
| <input type="radio"/> | <input type="radio"/> | <input type="radio"/> | <input type="radio"/> | <input type="radio"/> |

Dear Sir / Madam, through this questionnaire, we invite you to participate in a study on antibiotics - attitudes and perceptions among patients.

Before completing this questionnaire, you will be given explanations and you can ask questions.

Please read the questions carefully and answer as accurately and completely as possible. This questionnaire is anonymous.

Thank you!

Answer the following questions by **YES** or **NO**:

| Questions:                                                                            | YES                   | NO                    |
|---------------------------------------------------------------------------------------|-----------------------|-----------------------|
| *Q8: Self-medication with antibiotics at any time in life.                            | <input type="radio"/> | <input type="radio"/> |
| *Q9: Self-medication with antibiotics in the last month.                              | <input type="radio"/> | <input type="radio"/> |
| *Q10: Compliant with the physician recommendation regarding the antibiotic treatment. | <input type="radio"/> | <input type="radio"/> |
| *Q11: Return to the physician after the antibiotic treatment.                         | <input type="radio"/> | <input type="radio"/> |
| *Q12: Demand an antibiotic treatment for a common cold.                               | <input type="radio"/> | <input type="radio"/> |
| *Q13: Demand an antibiotic treatment for a dental infection.                          | <input type="radio"/> | <input type="radio"/> |
| *Q14: Interested to ask for information about the prescribed antibiotic.              | <input type="radio"/> | <input type="radio"/> |

Answer the following questions by **YES**, **NO** or **I don't know**:

| Questions:                                                  | YES                   | NO                    | I DON'T KNOW          |
|-------------------------------------------------------------|-----------------------|-----------------------|-----------------------|
| *Q15: Antibiotic administration may induce adverse effects. | <input type="radio"/> | <input type="radio"/> | <input type="radio"/> |
| *Q16: Some antibiotics may induce malformations.            | <input type="radio"/> | <input type="radio"/> | <input type="radio"/> |

Answer the following questions by **TRUE** or **FALSE**:

| Questions:                                                                                | True                  | False                 |
|-------------------------------------------------------------------------------------------|-----------------------|-----------------------|
| *Q17: Bacteria may cause common cold.                                                     | <input type="radio"/> | <input type="radio"/> |
| *Q18: Antibiotics are efficient for the treatment of bacterial infections.                | <input type="radio"/> | <input type="radio"/> |
| *Q19: Antibiotics are efficient for the treatment of viral infections.                    | <input type="radio"/> | <input type="radio"/> |
| *Q20: Antibiotics are efficient for the treatment of both bacterial and viral infections. | <input type="radio"/> | <input type="radio"/> |

Dear Sir / Madam, through this questionnaire, we invite you to participate in a study on antibiotics - attitudes and perceptions among patients.

Before completing this questionnaire, you will be given explanations and you can ask questions.

Please read the questions carefully and answer as accurately and completely as possible. This questionnaire is anonymous.

Thank you!

\*Q 21: The usual duration of antibiotic treatment in pneumonia is:

- less than 3 days
- 3-7 days
- more than 7 days

\* Q22: Which of the following conditions needs antibiotic treatment:

- cough
- chills
- inflammation
- dental infection
- throat
- fever
- neoplasia

Answer the following questions by **YES**, **NO** or **I don't know**:

| Questions:                                                                                            | YES                   | NO                    | I DON'T KNOW          |
|-------------------------------------------------------------------------------------------------------|-----------------------|-----------------------|-----------------------|
| *Q23: Do you believe that the antibiotics you will receive might contribute to antibiotic resistance? | <input type="radio"/> | <input type="radio"/> | <input type="radio"/> |
| *Q24: As a future problem for the medical practice.                                                   | <input type="radio"/> | <input type="radio"/> | <input type="radio"/> |
| *Q25: Do you think that it is better to take less antibiotics than those prescribed?                  | <input type="radio"/> | <input type="radio"/> | <input type="radio"/> |
| *Q26: As a national problem.                                                                          | <input type="radio"/> | <input type="radio"/> | <input type="radio"/> |
| *Q27: As a problem for Romanian hospitals.                                                            | <input type="radio"/> | <input type="radio"/> | <input type="radio"/> |
| *Q28: Missing an antibiotic dose contributes to antibiotic resistance.                                | <input type="radio"/> | <input type="radio"/> | <input type="radio"/> |

Answer the following questions by **TRUE** or **FALSE**:

| Questions:                                                                                                                | True                  | False                 |
|---------------------------------------------------------------------------------------------------------------------------|-----------------------|-----------------------|
| *Q29: Antibiotic resistance is a result of insufficient knowledge about antibiotic use.                                   | <input type="radio"/> | <input type="radio"/> |
| *Q30: Antibiotic resistance defined as if taken too often, antibiotics will become less and less effective in the future. | <input type="radio"/> | <input type="radio"/> |
| *Q31: Antibiotic resistance is caused by the overuse of antibiotics.                                                      | <input type="radio"/> | <input type="radio"/> |
| *Q32: Antibiotic resistance can result after inappropriate use of antibiotics outside the doctor's indications.           | <input type="radio"/> | <input type="radio"/> |

Dear Sir / Madam, through this questionnaire, we invite you to participate in a study on antibiotics - attitudes and perceptions among patients.

Before completing this questionnaire, you will be given explanations and you can ask questions.

Please read the questions carefully and answer as accurately and completely as possible. This questionnaire is anonymous.

Thank you!

How do you appreciate that the following statements could prevent the development of antibiotic resistance?

| Questions:                                                                               | Total agree           | Partial agree         | Neutral               | Partial disagree      | Total disagree        |
|------------------------------------------------------------------------------------------|-----------------------|-----------------------|-----------------------|-----------------------|-----------------------|
| *Q33: Wait for the laboratory results in severe infections                               | <input type="radio"/> | <input type="radio"/> | <input type="radio"/> | <input type="radio"/> | <input type="radio"/> |
| *Q34: Administer an antibiotic in a febrile patient unless severity criteria are present | <input type="radio"/> | <input type="radio"/> | <input type="radio"/> | <input type="radio"/> | <input type="radio"/> |
| *Q35: Accept the most frequent recommended antibiotic                                    | <input type="radio"/> | <input type="radio"/> | <input type="radio"/> | <input type="radio"/> | <input type="radio"/> |
| *Q36: Respect the dosage and timing for the administration of the prescribed antibiotic  | <input type="radio"/> | <input type="radio"/> | <input type="radio"/> | <input type="radio"/> | <input type="radio"/> |

***Thank you for collaboration!***
